# Supplementary material
Source: PubMed Central journal article supplement (PMC4955404)

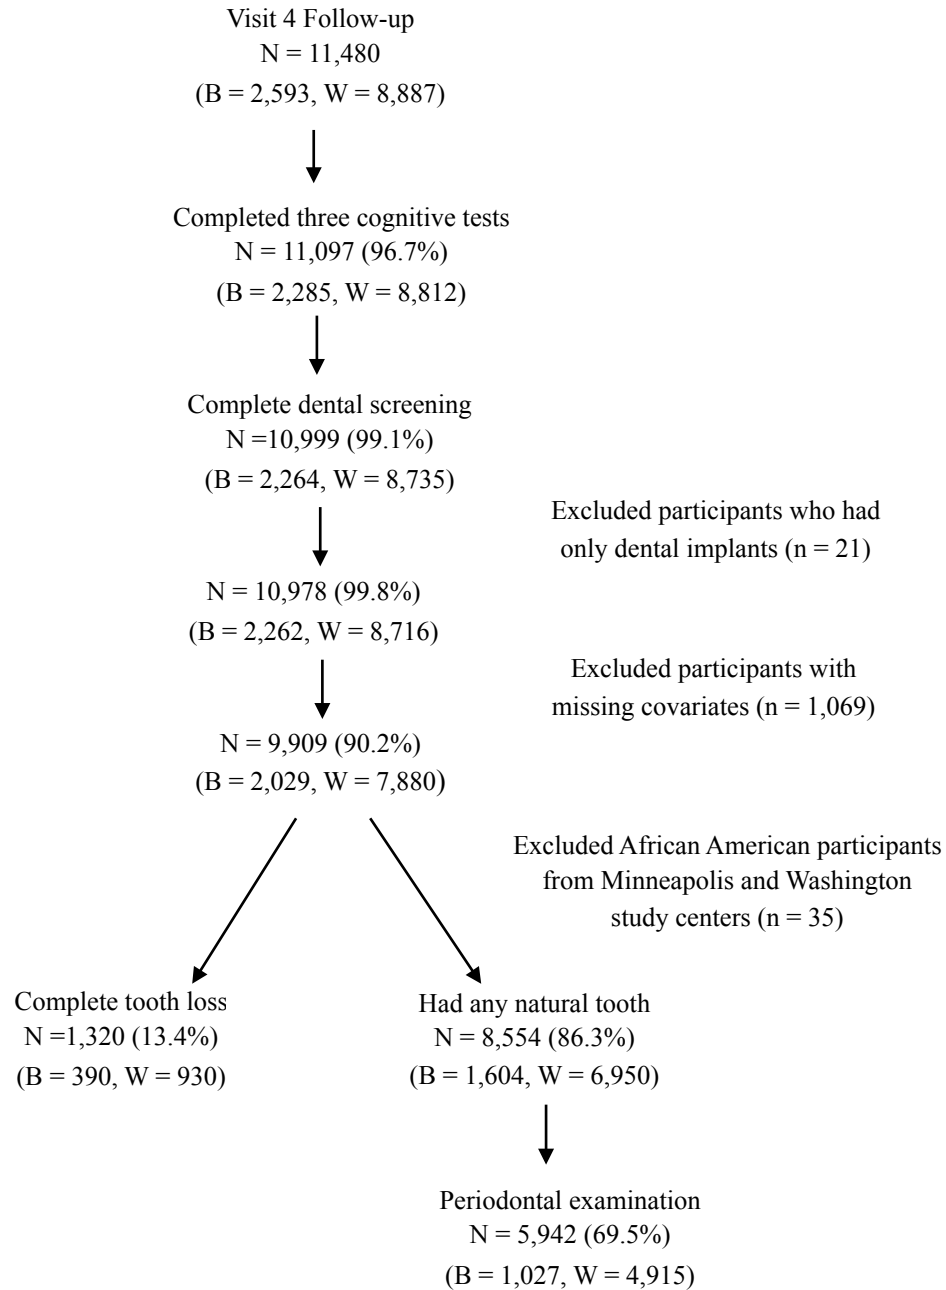

Supplement: NIHMS795261-supplement-Supp_Fig_1.pdf [file NIHMS795261-supplement-Supp_Fig_1.pdf]

Percent of probing sites

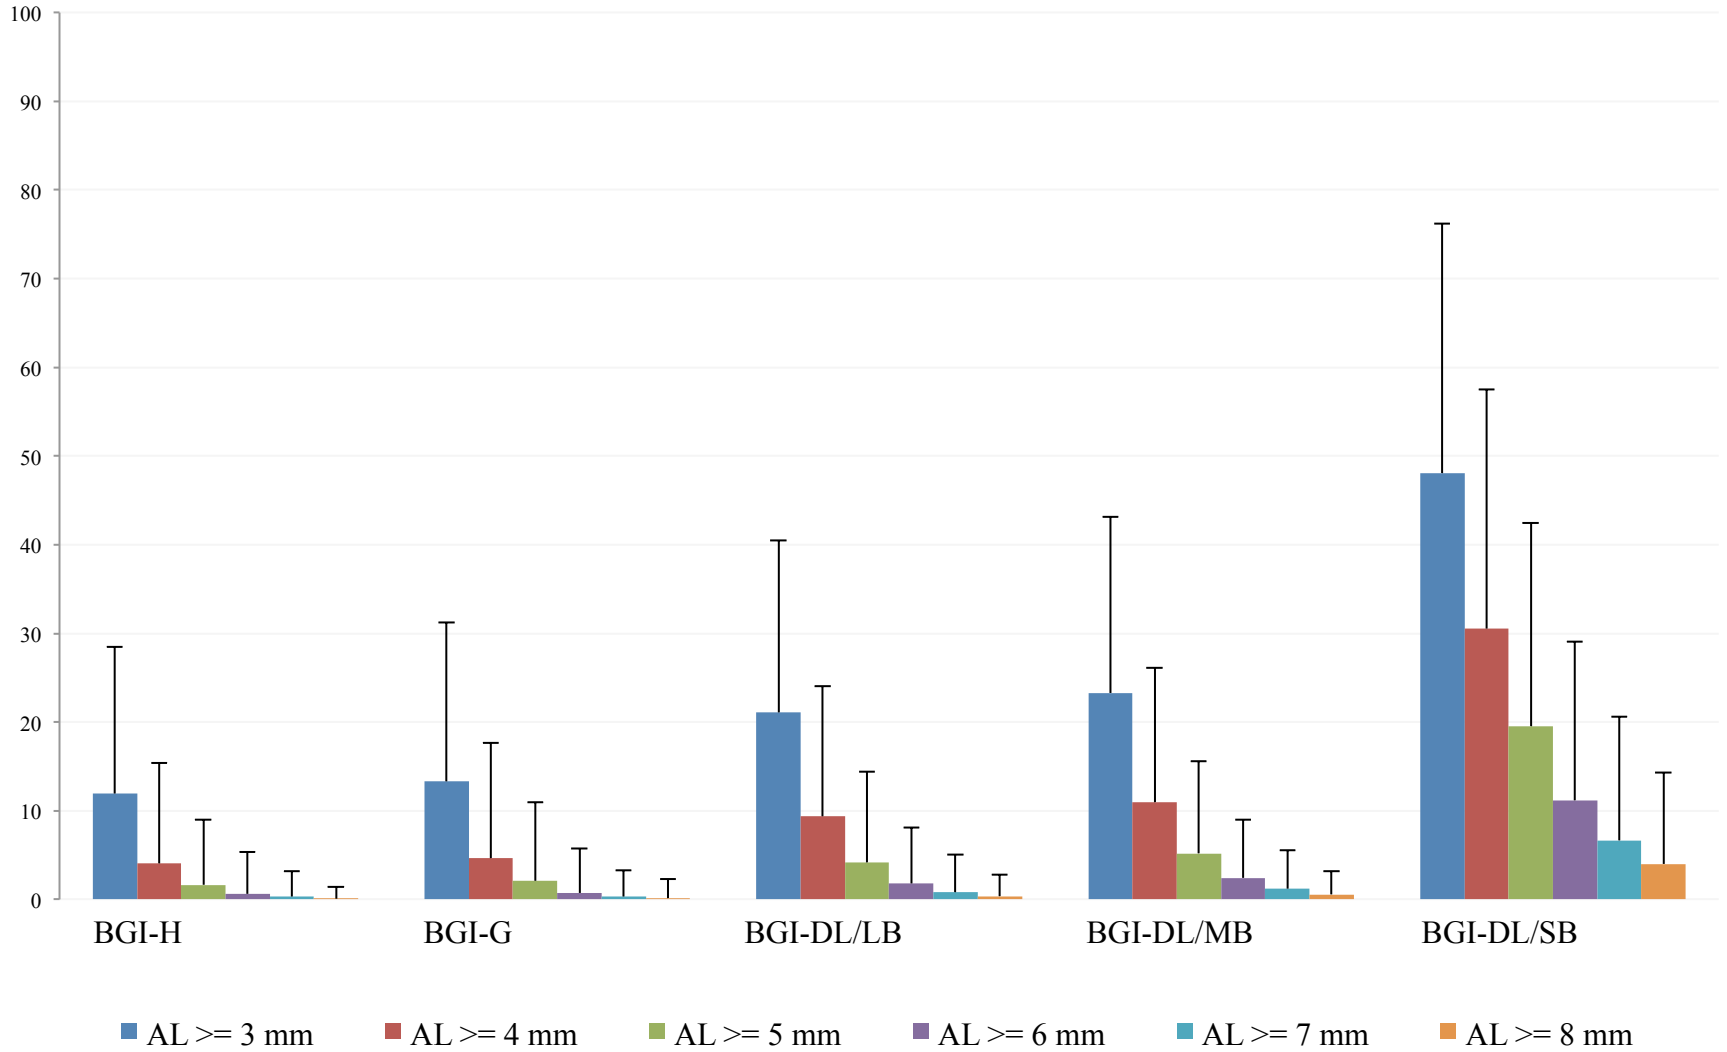

Supplement: NIHMS795261-supplement-Supp_Fig_2.pdf [file NIHMS795261-supplement-Supp_Fig_2.pdf]

Percent of probing sites

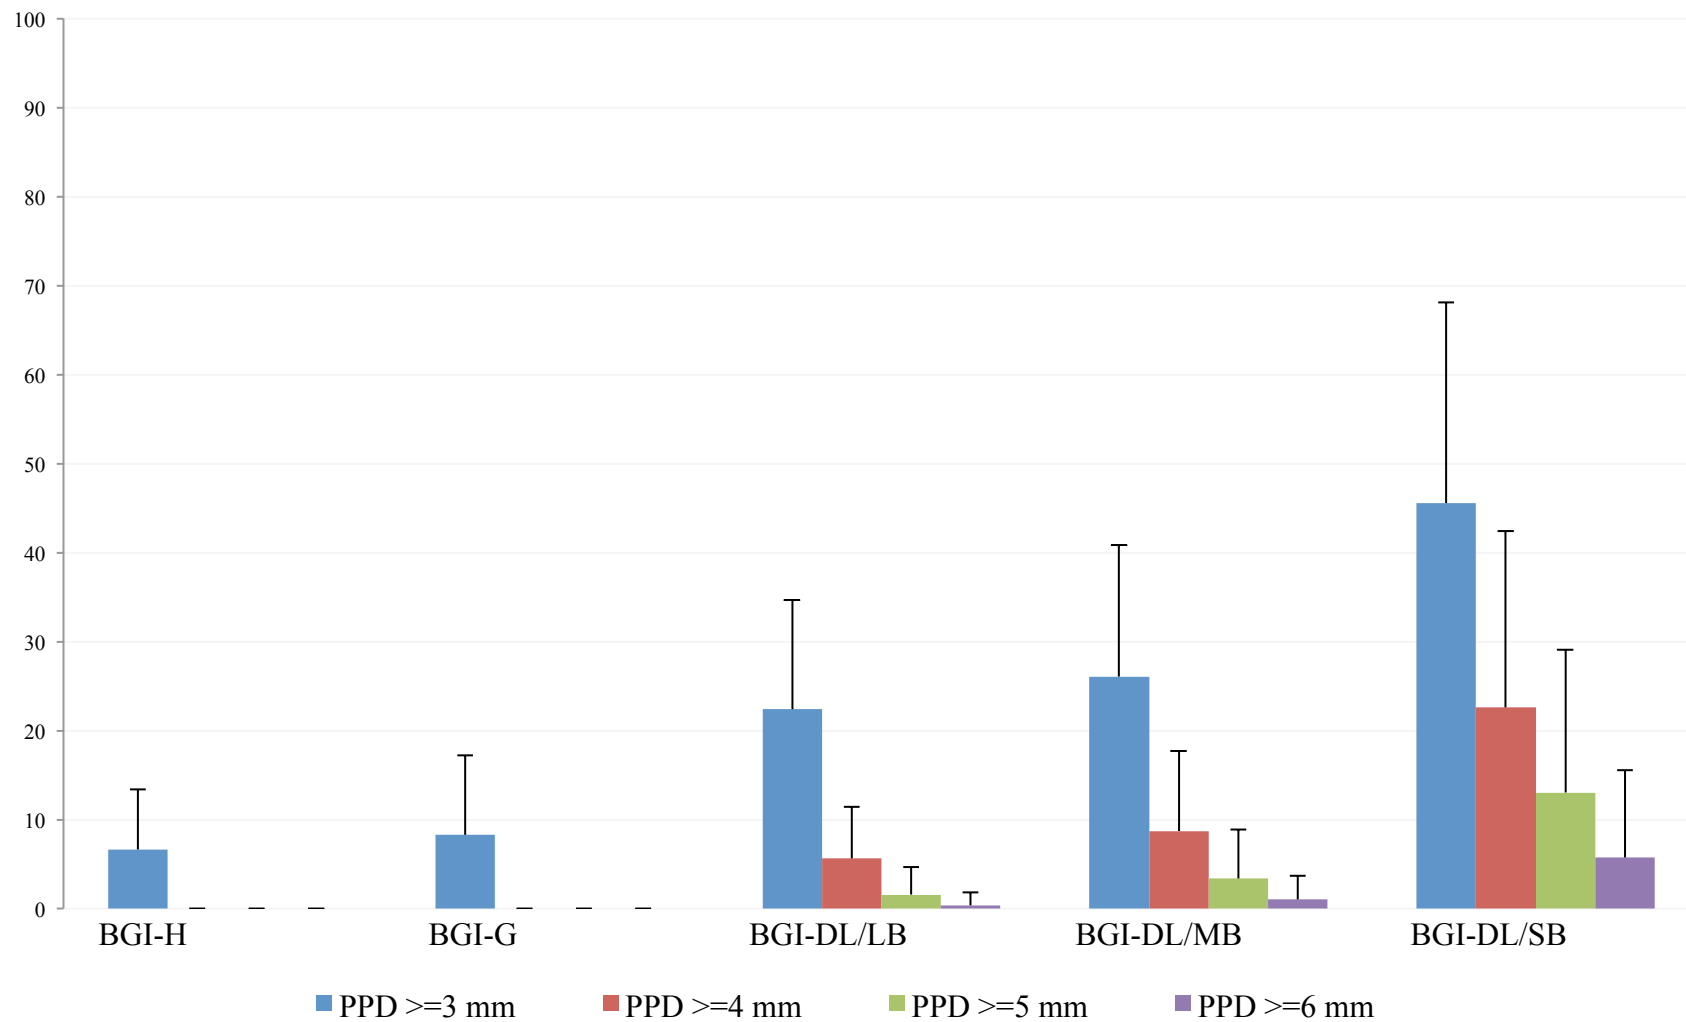

Supplement: NIHMS795261-supplement-Supp_Fig_3.pdf [file NIHMS795261-supplement-Supp_Fig_3.pdf]
